# Supplementary material for: Genetic variability of Akhal-Teke horses bred in Italy
Source: PeerJ. 2018 Sep 6;6:e4889. doi: 10.7717/peerj.4889 (PMC6129384; doi:10.7717/peerj.4889)
Supplement: Table S2 — Chromosome position in cM of the 17 horse microsatellites (Sheet 1). Linkage disequilibrium P-val (P < 0.005) estimated on Italian Akhal-Teke population (all samples) (Sheet 2). Linkage disequilibrium P-val (P < 0.005) estimated on Founders Italian Akhal-Teke population (imported 1991–2000) and on New population of Italian Akhal-Teke (born after 2000) (Sheet 3). [file peerj-06-4889-s002.xlsx]

## Sheet: Supplemental Table S2 Sheet1
Supplemental Table S2
Chromosome position in cM of the 17 horse microsatellites
LOCUS	Chromosome location	Distance cM*
HMS7	1q25	156.5
ASB17	2p14-q15	41.7
ASB23	3q22.1-q22.3	110.3
HMS6	4	10.1
HTG7	4	71.3
AHT5	8	0
HMS3	9	29.5
HTG4	9	0
HMS2	10	70
ASB2	15q21.3-q23	51
HTG6	15q26-q27	63.2
HMS1	15	90.3
HTG10	21	24.5
VHL20	30	31.4
AHT4	24q14	3.8
CA425	28q18	63.1
LEX03	Xq	65.2
* Distance in cM according by Swinburne J. et al. (2006)

## Sheet: Supplemental Table S2 Sheet2
Supplemental Table S2
Linkage disequilibrium P-val (P<0.005) estimated in Italian Akhal-Teke population (all samples)
Chr	Locus	Arlequin		Genepop
		Exact P-val	c2	Exact P-val
15	ASB2 vs HMS1	0	0	0.032
	ASB2 vs HTG6	0	0	0.054
	HTG6 vs HMS1	0.05	0.041	0.015
9	HTG4 vs HMS3	0.045	0.337	0.045
4	HTG7 vs HMS6	0.436	0.67	0.215

## Sheet: Supplemental Table S2 Sheet3
Supplemental Table S2
Linkage disequilibrium P-val (P<0.005) estimated in Founders Italian Akhal-Teke population (imported 1991-2000)
Chr	Locus	Arlequin		Genepop
		Exact P-val	c2	Exact P-val
15	ASB2 vs HMS1	0.13099	0.37021	0.53778
	ASB2 vs HTG6	0.96188	0.93619	1000
	HTG6 vs HMS1	0.07527	0.13087	0.4342
9	HTG4 vs HMS3	0.17693	0.70307	0.67639
4	HTG7 vs HMS6	0.35973	0.4665	0.68649
Linkage disequilibrium P-val (P<0.005) estimated in New population of Italian Akhal-Teke (born after 2000)
Chr	Locus	Arlequin		Genepop
		Exact P-val	c2	Exact P-val
15	ASB2 vs HMS1	0	0.00026	0.13828
	ASB2 vs HTG6	0	0.00026	0.03943
	HTG6 vs HMS1	0.17889	0.14161	0.03897
9	HTG4 vs HMS3	0.16227	0.74659	0.03437
4	HTG7 vs HMS6	0.55718	0.59981	0.04367
