# Supplementary material for: Genetic variability of Akhal-Teke horses bred in Italy
Source: PeerJ. 2018 Sep 6;6:e4889. doi: 10.7717/peerj.4889 (PMC6129384; doi:10.7717/peerj.4889)
Supplement: Table S5 — The matrix of pairwise population genetic differentiation (FST) was calculated based on mtDNA sequences and was used to evaluate genetic differentiation among Italian AKH, Italian Arabian, and the 93 horse GenBank sequences used. AKH_ITY = Akhal-Teke and ARH_ITY = Arabian horse present study; CAP_a, Caspian Pony and AKH_d, Akhal-Teke horse Flanneryetal2003; CAP_b, Caspian Pony and BRH, Barb horse (Jansen et al., 2002); ARH_a, Arabian horse, AKH _a, Akhal-Teke horse and PRZ, Przewalskii horse (Achilli et al., 2012); AKH_b, Akhal-Teke horse (McGahern et al., 2006); AKH_c, Akhal-Teke horse (Lippold et al., 2011); AKH_e, Akhal-Teke horse (Priskin et al., 2010); Ref_seq, X79547 Xuetal1997 and JN398377 (Achilli et al., 2012). [file peerj-06-4889-s005.xlsx]

## Sheet: Foglio1
Supplemental Table S5
Supplemental Table S5: Matrix of pairwise FST
AKH _ITY= Akhal-Teke and ARH _ITY= Arabian horse present study; CAP_a = Caspian Pony and AKH _d = Akhal-Teke horse (Flannery et al. 2003);
CAP_b = Caspian Pony and BRH = Barb horse (Jansen et al. 2002); ARH _a = Arabian horse, AKH _a = Akhal-Teke horse and PRZ = Przewalskii horse (Achilli et al. 2012);
AKH _b = Akhal-Teke horse (McGahern et al. 2006); AKH _c = Akhal-Teke horse (Lippold et al. 2011); AKH _e = Akhal-Teke horse (Priskin et al 2010);
Ref_seq = X79547 (Xu et al 1997) and JN398377(Achilli et al 2012).
Breed	Ref_seq	AKH_ITY	ARH_ITY	ARH_a	CAP_a	CAP_b	BRH	PRZ	AKH_a	AKH_b	AKH_c	AKH_d	AKH_e
Ref_seq	0
AKH_ITY	0.25552	0
ARH_ITY	0.24861	0.02727	0
ARH_a	0.16849	0	0	0
CAP_a	0.29907	0	0	0	0											>0.000
CAP_b	0.17064	0.07832	0.01496	0.02398	0.04708	0										>0.200
BRH	0.35277	0.06047	0	0.01269	0	0.08151	0									>0.400
PRZ	1	0.21306	0.34255	0.19063	0.29907	0.5194	0.38549	0								>0.600
AKH_a	0.29561	0.00271	0.07151	0	0.08003	0.13295	0.08977	0.27098	0							>0.800
AKH_b	0.27542	0	0	0	0	0.05204	0.0077	0.28452	0.04378	0
AKH_c	0.22875	0.02941	0.12201	0.01312	0.11224	0.108	0.18813	0.28076	0.042	0.09763	0
AKH_d	0.42198	0.11876	0.20683	0.05054	0.27234	0.26223	0.23726	0.49586	0	0.19711	0.10439	0
AKH_e	0.33333	0	0.05779	0	0.09434	0	0.15414	0.66667	0.01577	0.07249	0	0	0
