# Supplementary material for: Genetic variability of Akhal-Teke horses bred in Italy
Source: PeerJ. 2018 Sep 6;6:e4889. doi: 10.7717/peerj.4889 (PMC6129384; doi:10.7717/peerj.4889)
Supplement: Table S6 — The raw data are the genotype of the 95 samples of AKH bred in Italy. The 17 microsatellites are AHT4, AHT5, ASB2, ASB17, ASB23, CA425, HMS1, HMS2, HMS3, HMS6, HMS7, HTG4, HTG6, HTG7, HTG10, VHL20 and LEX03. Data are in GENEPOP format (3-Digit Alleles format). Data are in GENEPOP format (3-Digit Alleles format). The microsatellite LEX03 maps on X chromosome. The females are homozygous or heterozygous at the locus, whereas the males are hemizygous. [file peerj-06-4889-s006.xlsx]

## Sheet: Foglio1
Pop ID	Ind ID	AHT4	AHT4	AHT5	AHT5	ASB17	ASB17	ASB2	ASB2	ASB23	ASB23	CA425	CA425	HMS1	HMS1	HMS2	HMS2	HMS3	HMS3	HMS6	HMS6	HMS7	HMS7	HTG4	HTG4	HTG6	HTG6	HTG7	HTG7	HTG10	HTG10	VHL20	VHL20	LEX03	LEX03
AKH	AK01	148	152	131	133	99	117	245	253	188	188	239	241	176	182	225	225	160	160	167	169	173	183	132	132	84	84	120	128	97	105	96	96	139
AKH	AK02	148	158	139	139	99	99	253	253	186	192	239	239	182	182	235	239	160	166	169	169	173	183	132	132	84	100	120	124	97	105	96	98	157	161
AKH	AK03	148	162	131	131	0	0	245	245	0	0	0	0	0	0	227	229	160	160	167	169	177	183	128	132	84	90	126	128	105	111	90	98	0
AKH	AK04	148	158	133	139	97	99	249	253	188	188	239	241	176	182	219	239	166	170	167	169	177	183	128	132	100	100	120	120	93	105	98	100	155	157
AKH	AK05	148	148	133	139	117	119	245	251	192	210	239	239	176	182	225	235	160	166	167	167	173	181	132	132	84	100	120	128	97	111	96	96	155	155
AKH	AK06	148	152	133	141	0	0	247	255	0	0	0	0	0	0	225	225	160	164	159	169	179	183	132	132	84	84	120	128	97	97	96	96	0
AKH	AK07	148	152	139	141	111	111	247	253	188	210	239	241	176	182	219	239	160	160	167	167	173	173	128	140	84	100	128	128	105	111	98	106	153	157
AKH	AK08	148	158	133	139	99	117	249	253	188	188	239	241	176	182	219	225	160	166	167	167	183	183	128	132	84	100	120	128	93	105	96	98	157
AKH	AK09	148	148	141	141	99	121	237	241	188	188	237	241	174	180	225	239	152	166	163	167	173	183	132	132	84	90	120	120	97	105	90	98	161
AKH	AK10	148	152	131	133	99	117	245	253	188	188	239	241	176	182	225	225	160	160	167	169	173	183	132	132	84	84	120	128	97	105	96	96	141
AKH	AK11	148	152	131	133	117	117	245	245	188	192	239	239	182	182	225	235	160	160	167	167	181	183	132	132	84	84	120	128	97	111	96	96	141	155
AKH	AK12	152	154	131	139	0	0	241	245	0	0	0	0	0	0	225	227	160	166	167	167	173	173	132	132	84	84	128	128	97	105	88	96	0
AKH	AK13	148	148	131	139	0	0	245	253	0	0	0	0	0	0	219	225	160	160	167	169	173	183	132	140	84	84	120	128	97	111	96	106	0
AKH	AK14	148	148	131	139	0	0	237	253	0	0	0	0	0	0	225	235	160	166	167	167	173	177	128	132	100	100	128	128	105	109	96	106	0
AKH	AK15	148	148	131	139	0	0	237	253	0	0	0	0	0	0	225	235	160	166	167	167	173	177	128	132	100	100	128	128	105	109	96	106	0
AKH	AK16	148	152	133	139	0	0	245	251	0	0	0	0	0	0	225	225	160	166	167	169	173	173	132	132	84	84	120	128	97	97	96	96	0
AKH	AK17	148	148	131	133	0	0	237	241	0	0	0	0	0	0	227	239	164	166	161	169	173	173	132	132	90	100	128	128	97	97	96	106	0
AKH	AK18	148	152	133	141	0	0	237	253	0	0	0	0	0	0	219	239	160	162	159	169	173	181	132	132	84	90	128	128	97	105	98	100	0
AKH	AK19	154	162	133	139	0	0	241	241	0	0	0	0	0	0	227	239	152	166	161	167	173	173	132	132	84	84	126	128	97	101	88	90	0
AKH	AK20	148	162	131	133	0	0	245	255	0	0	0	0	0	0	225	229	164	166	163	163	183	183	128	136	84	90	120	126	97	105	88	98	0
AKH	AK21	148	162	133	133	0	0	237	253	0	0	0	0	0	0	225	227	160	160	163	167	173	183	132	140	84	84	128	128	97	105	96	106	0
AKH	AK22	148	148	131	141	97	99	237	245	192	192	239	239	182	182	219	225	160	168	167	167	175	183	132	132	84	100	128	128	97	109	96	106	139	157
AKH	AK23	148	152	131	131	0	0	253	253	0	0	0	0	0	0	225	235	160	160	167	167	173	177	128	132	84	100	120	128	97	109	96	106	0
AKH	AK24	148	152	131	133	0	0	245	245	0	0	0	0	0	0	225	229	160	160	167	169	173	183	128	132	84	90	120	126	97	105	96	98	0
AKH	AK25	152	154	133	139	109	117	241	245	188	190	239	241	176	182	225	237	152	160	167	167	173	173	132	132	84	84	120	128	105	105	88	96	153
AKH	AK26	148	148	133	139	99	119	251	253	186	192	231	239	182	182	239	239	164	166	167	167	173	173	132	132	84	100	120	128	99	105	98	102	159	161
AKH	AK27	148	152	133	133	99	99	253	253	186	210	239	241	182	182	225	239	160	164	167	169	173	173	132	132	84	84	120	120	97	99	96	102	141	161
AKH	AK28	152	162	137	139	97	115	237	251	186	206	239	239	182	182	219	225	152	164	161	167	173	183	128	130	90	100	128	128	99	99	100	106	157
AKH	AK29	148	162	133	139	111	113	235	245	188	188	237	239	182	182	225	227	160	166	163	167	173	173	132	132	84	100	128	128	97	105	98	106	141	157
AKH	AK30	148	152	131	141	99	119	237	245	188	192	231	231	176	182	219	225	160	160	163	167	173	173	128	128	100	100	128	128	105	105	96	98	145	157
AKH	AK31	148	152	131	141	97	119	237	253	192	192	239	239	182	182	219	225	160	168	167	167	173	175	128	132	84	100	128	128	105	109	96	106	157	157
AKH	AK32	148	150	131	139	111	119	237	237	192	210	237	239	180	182	225	235	160	166	167	169	173	177	128	132	84	100	128	128	105	109	106	106	151	157
AKH	AK33	148	152	133	141	111	117	245	253	210	210	239	239	182	182	225	239	160	160	167	167	173	173	132	140	84	84	128	128	97	105	96	98	157
AKH	AK34	150	152	133	141	117	119	237	245	188	192	237	239	180	182	225	225	160	166	167	169	173	173	128	132	84	84	128	128	97	105	96	106	157
AKH	AK35	148	148	131	139	99	117	245	253	190	192	0	0	176	182	225	225	160	166	167	169	173	183	132	132	84	84	120	120	105	111	96	96	155
AKH	AK36	152	152	131	141	97	117	245	253	188	192	239	239	176	182	225	225	160	160	167	167	173	173	128	132	84	84	120	128	105	105	96	106	141	157
AKH	AK37	148	148	131	139	99	111	237	253	188	192	237	239	176	180	225	225	160	166	169	169	173	177	128	132	84	84	120	128	97	105	96	106	151
AKH	AK38	148	152	133	141	99	117	245	253	188	188	231	239	176	182	225	225	160	160	163	169	173	173	128	132	84	90	120	128	105	105	96	98	141	145
AKH	AK39	148	152	133	139	117	117	245	245	188	210	239	241	176	176	225	235	160	160	167	167	173	183	132	132	84	84	120	128	105	111	96	96	141	155
AKH	AK40	148	148	133	139	99	119	251	253	192	210	239	239	176	182	225	225	166	166	167	167	173	181	128	132	100	100	120	128	109	111	96	96	155	157
AKH	AK41	148	148	131	133	99	119	241	247	188	188	239	239	174	174	219	227	160	164	161	169	173	173	132	132	100	100	120	128	97	97	102	106	153	155
AKH	AK42	148	152	131	133	99	117	247	253	188	188	239	241	174	176	219	225	160	164	167	169	173	183	132	132	84	100	120	120	97	105	96	106	141	155
AKH	AK43	148	148	131	131	117	119	245	247	188	188	239	241	174	182	219	225	160	160	169	169	173	173	132	132	84	100	120	128	97	105	96	106	141	153
AKH	AK44	148	148	133	139	111	111	247	253	190	192	239	239	176	182	225	235	160	164	159	167	177	179	132	132	84	100	128	128	97	109	96	106	155	157
AKH	AK45	148	162	131	131	117	117	245	253	192	192	239	239	176	182	225	229	160	160	167	169	173	177	132	132	84	84	120	128	105	111	96	98	155
AKH	AK46	158	162	139	139	111	111	237	251	188	190	237	239	174	182	219	239	162	162	167	167	173	183	132	138	84	90	128	128	105	109	96	96	159
AKH	AK47	148	148	137	139	97	119	241	245	188	190	231	231	176	182	219	221	162	162	167	167	175	183	132	132	84	102	120	128	97	97	98	104	155
AKH	AK48	148	148	131	139	99	111	237	241	188	188	237	239	176	180	221	227	160	164	169	169	177	183	132	132	84	84	128	128	105	105	100	106	157	157
AKH	AK49	148	148	131	139	99	111	247	251	188	188	239	239	174	180	221	239	160	166	169	169	183	183	132	132	84	84	120	120	105	105	96	100	157	157
AKH	AK50	148	148	139	141	99	111	237	249	188	188	239	239	176	180	221	239	160	164	169	169	177	183	132	132	84	84	120	128	99	105	96	100	141	157
AKH	AK51	148	148	131	139	99	99	241	253	188	188	239	239	176	180	225	239	160	164	159	169	183	183	132	132	84	84	120	120	93	105	100	106	141
AKH	AK52	148	148	131	139	99	99	249	249	188	188	239	239	174	174	221	221	160	166	157	169	183	183	132	132	84	84	120	128	105	105	94	96	157
AKH	AK53	148	148	139	141	99	111	249	249	188	188	237	239	174	176	221	227	160	166	161	169	177	177	132	132	84	84	120	120	105	105	96	100	157
AKH	AK54	148	152	131	139	99	117	245	253	192	192	239	239	182	182	225	235	160	166	167	167	173	183	132	132	84	100	128	128	105	111	96	96	155
AKH	AK55	148	148	131	131	111	119	237	247	188	192	239	239	174	182	219	235	160	166	167	169	173	177	132	132	100	100	120	128	97	105	102	106	153	157
AKH	AK56	148	152	131	139	99	117	253	253	188	192	239	239	174	182	225	235	160	166	167	167	173	183	132	132	100	100	120	128	97	109	106	106	141	157
AKH	AK57	152	162	133	133	109	117	241	253	188	190	239	239	182	182	225	227	160	166	161	169	173	173	132	132	84	84	126	128	105	105	90	96	141	153
AKH	AK58	148	152	133	139	99	111	241	253	186	192	239	239	176	182	225	239	164	166	163	169	173	179	132	132	84	100	128	128	97	105	96	98	157
AKH	AK59	148	158	133	139	99	113	253	253	188	192	239	239	176	182	225	239	160	164	163	169	173	173	132	132	84	84	128	128	105	105	96	98	157
AKH	AK60	158	162	133	133	113	119	237	253	188	192	237	239	182	182	227	239	160	160	163	169	173	173	132	132	84	84	120	128	99	105	98	102	157	161
AKH	AK61	152	158	133	133	109	119	237	253	186	188	237	241	182	182	235	239	160	166	161	169	173	175	132	132	84	100	128	128	97	105	102	106	155	157
AKH	AK62	152	158	131	133	99	119	237	253	188	192	239	241	182	182	225	239	160	160	163	167	173	173	132	132	84	84	128	128	97	105	96	98	141	157
AKH	AK63	148	152	131	131	99	119	237	245	188	192	239	239	176	182	225	225	160	160	167	167	173	183	132	132	84	100	120	128	105	109	96	96	157
AKH	AK64	148	152	133	139	99	111	245	253	188	188	239	241	182	182	225	239	160	160	167	167	173	173	132	140	84	84	120	128	97	105	96	106	157
AKH	AK65	148	148	131	131	111	117	237	247	188	210	239	241	174	182	219	235	160	166	167	169	173	177	132	132	100	100	128	128	97	105	106	106	141
AKH	AK66	148	152	133	139	111	117	245	253	188	192	239	239	176	182	235	235	160	166	167	167	173	173	128	132	84	100	128	128	105	109	96	106	155
AKH	AK67	148	152	131	133	99	117	237	245	188	210	239	239	182	182	225	235	160	166	167	167	173	183	128	132	84	100	120	128	97	105	96	106	141
AKH	AK68	148	148	131	133	111	119	247	253	188	192	239	239	174	182	219	225	164	166	161	167	173	173	128	132	100	100	120	128	97	105	96	106	153
AKH	AK69	148	148	131	139	99	119	253	253	186	186	239	239	182	182	225	235	160	160	167	169	177	183	132	132	84	100	120	128	105	109	96	106	161
AKH	AK70	152	152	131	141	117	119	237	245	188	192	239	239	176	182	225	225	160	170	167	169	173	183	132	132	84	84	120	128	97	109	96	96	157
AKH	AK71	148	148	131	139	111	117	237	245	192	192	237	241	176	180	225	225	160	160	167	167	177	183	132	132	84	84	128	128	97	105	96	106	157
AKH	AK72	150	162	137	139	115	119	237	251	206	206	237	239	180	182	225	225	152	160	161	167	173	173	128	130	84	100	128	128	99	109	100	106	151
AKH	AK73	148	152	133	139	97	117	241	245	190	210	231	241	182	182	221	225	160	162	167	167	183	183	132	132	84	84	120	128	97	97	96	98	155
AKH	AK74	148	152	133	139	99	119	237	241	188	188	239	241	180	182	219	225	164	164	167	167	177	183	132	140	84	84	126	128	111	111	96	96	141
AKH	AK75	152	162	131	133	117	119	245	253	192	210	239	239	182	182	225	239	160	160	163	167	173	173	132	132	84	84	120	128	97	105	96	98	157
AKH	AK76	152	162	133	133	99	113	237	253	186	188	237	239	176	182	239	239	160	164	163	163	173	173	132	132	84	84	120	128	97	105	98	102	161
AKH	AK77	148	158	133	133	99	113	237	253	188	192	239	239	176	182	225	239	160	166	169	169	173	179	132	132	84	84	128	128	97	105	98	98	157	161
AKH	AK78	148	152	131	139	97	111	245	245	188	192	239	241	176	182	225	225	164	164	167	169	173	183	128	132	84	102	120	128	97	105	96	100	157
AKH	AK79	148	148	131	131	99	119	237	253	188	192	231	241	176	182	225	225	160	160	163	167	173	183	128	132	84	100	120	128	97	105	96	96	141	145
AKH	AK80	148	152	137	139	97	119	237	251	206	210	239	239	176	182	225	225	152	166	161	167	173	181	128	132	90	100	128	128	99	111	96	100	155
AKH	AK81	150	162	131	139	115	119	237	237	192	206	239	239	180	182	225	225	164	166	167	167	173	177	128	130	84	90	128	128	99	109	106	106	157
AKH	AK82	152	152	137	141	97	111	251	253	186	188	239	239	182	182	219	225	160	164	161	167	173	183	128	128	84	100	128	128	99	111	100	106	153
AKH	AK83	148	148	133	139	99	111	245	245	188	188	239	241	174	182	219	225	164	164	167	169	183	183	132	132	90	102	128	128	97	105	100	106	153
AKH	AK84	152	162	133	133	99	111	241	253	186	186	239	241	180	182	225	227	160	166	169	169	173	173	132	132	84	84	120	120	99	111	94	96	141	155
AKH	AK85	154	162	133	139	0	0	241	251	0	0	0	0	176	180	227	227	166	166	169	169	173	183	132	138	84	84	120	128	93	111	94	106	0
AKH	AK86	148	152	131	141	99	111	239	253	186	192	229	241	174	176	225	225	152	164	161	169	175	175	132	132	100	100	126	128	99	105	96	98	145	159
AKH	AK87	148	148	133	141	111	111	239	241	192	192	237	247	176	182	225	239	164	164	161	169	173	175	132	132	100	100	128	128	105	105	96	98	159
AKH	AK88	148	152	137	139	97	119	237	245	186	192	239	239	182	182	225	235	152	160	161	167	173	183	128	132	84	90	128	128	97	99	96	106	155	157
AKH	AK89	148	148	139	139	99	119	245	253	188	188	231	239	176	176	225	225	160	160	163	167	173	173	128	132	84	90	120	128	97	105	096	096	157
AKH	AK90	148	152	0	0	97	111	237	253	186	210	237	239	182	182	225	235	152	166	161	169	173	177	128	128	90	100	128	128	99	105	106	106	151
AKH	AK91	148	152	139	139	97	111	247	251	188	206	239	241	176	182	219	219	152	160	169	169	173	183	130	140	100	100	128	128	99	105	100	106	157	157
AKH	AK92	148	158	131	131	99	111	237	237	192	192	237	239	174	182	219	219	162	166	167	169	173	181	132	132	90	100	120	128	97	99	96	102	153	155
AKH	AK93	148	152	131	139	99	119	237	255	188	192	237	239	182	182	221	225	160	166	167	169	173	173	132	132	84	100	128	128	97	105	98	106	151
AKH	AK94	148	152	131	139	97	111	237	251	192	206	239	239	182	182	225	235	152	160	167	167	173	183	128	132	90	100	120	128	97	99	100	102	153
AKH	AK95	152	162	131	131	117	119	245	255	188	188	237	239	182	182	221	227	164	166	169	169	173	173	132	132	84	84	128	128	97	105	98	98	151	153
